# Supplementary material for: Development and Characterization of MYB-NFIB Fusion Expression in Adenoid Cystic Carcinoma
Source: MDPI journal article supplement (doi:10.3390/cancers14092263), 2022-04-30
Supplement: s1 [file s1]

**Supplemental Table S1:** List of primers used for the cloning and qPCR analysis.

[illegible]



**Supplementary Table S3:** Differentially expressed genes between MYB vs MYB-NFIB. After adjusting for multiple testing (FDR <0.05), differentially expressed genes were called by applying a fold-change cutoff of two.

|    |                 | symbol       | baseMean    | log2FoldChange | lfcSE      | pvalue     | padj       |
|----|-----------------|--------------|-------------|----------------|------------|------------|------------|
| 1  | ENSG00000004809 | SLC22A16     | 5.017817387 | -6.712606466   | 1.15053973 | 5.40E-09   | 2.47E-07   |
| 2  | ENSG00000254146 | HMG81P46     | 4.863668187 | -6.66517831    | 1.16097046 | 9.41E-09   | 4.07E-07   |
| 3  | ENSG00000118308 | IRAG2        | 22.73876629 | -4.076651897   | 0.42303635 | 5.60E-22   | 1.27E-19   |
| 4  | ENSG00000165983 | PTER         | 12.8070835  | -4.064277435   | 0.53995906 | 5.19E-14   | 4.62E-12   |
| 5  | ENSG00000144057 | TSG6AL2      | 13.73707483 | -4.047540347   | 0.55484542 | 2.99E-13   | 2.43E-11   |
| 6  | ENSG00000169122 | FAM110B      | 5.766748922 | -4.035289908   | 0.81896469 | 8.34E-07   | 2.65E-05   |
| 7  | ENSG00000169862 | CTNND2       | 14.42126349 | -3.550789491   | 1.20858192 | 0.00330358 | 0.03301126 |
| 8  | ENSG00000099399 | MAGEB2       | 152.9724349 | -3.449339145   | 0.14478291 | 1.87E-125  | 6.04E-122  |
| 9  | ENSG00000022556 | NLRP2        | 27.74923978 | -3.407480039   | 0.35300181 | 4.78E-22   | 1.12E-19   |
| 10 | ENSG00000060303 | RPS17P5      | 14.78560872 | -3.238143834   | 0.46320342 | 2.73E-12   | 1.96E-10   |
| 11 | ENSG00000227234 | SPANXB1      | 11.41255648 | -3.214175135   | 0.50023211 | 1.32E-10   | 7.68E-09   |
| 12 | ENSG00000111837 | MAK          | 8.335021505 | -3.167597604   | 0.60923771 | 2.00E-07   | 7.26E-06   |
| 13 | ENSG00000089177 | KIF16B       | 58.85440306 | -3.094999725   | 0.22103592 | 1.51E-44   | 1.43E-41   |
| 14 | ENSG00000196406 | SPANXD       | 78.08712272 | -3.002821564   | 0.18674148 | 3.52E-58   | 6.30E-55   |
| 15 | ENSG00000081237 | PTPRC        | 7.066407771 | -2.950318442   | 0.67103785 | 1.10E-05   | 0.00027219 |
| 16 | ENSG00000132972 | RNF17        | 11.49575718 | -2.937719865   | 0.49284648 | 2.51E-09   | 1.19E-07   |
| 17 | ENSG00000230316 | FEZF1-AS1    | 9.250077703 | -2.909400519   | 0.54187913 | 7.91E-08   | 3.03E-06   |
| 18 | ENSG00000197077 | KIAA1671     | 61.17331796 | -2.884195777   | 0.21741994 | 3.67E-40   | 2.36E-37   |
| 19 | ENSG00000149557 | FEZ1         | 24.5978393  | -2.812782227   | 0.32471456 | 4.62E-18   | 6.77E-16   |
| 20 | ENSG00000183166 | CALN1        | 36.96930154 | -2.791473379   | 0.28480374 | 1.11E-22   | 2.75E-20   |
| 21 | ENSG00000179163 | FUCA1        | 30.90234101 | -2.738054503   | 0.28410117 | 5.55E-22   | 1.27E-19   |
| 22 | ENSG00000144908 | ALDH1L1      | 67.04846338 | -2.668214132   | 0.20636625 | 3.07E-38   | 1.90E-35   |
| 23 | ENSG00000172543 | CTSW         | 6.95652474  | -2.56072554    | 0.61332794 | 2.98E-05   | 0.00064955 |
| 24 | ENSG00000144229 | THSD7B       | 17.09918251 | -2.523489978   | 0.41736291 | 1.48E-09   | 7.30E-08   |
| 25 | ENSG00000101850 | GPR143       | 10.12128629 | -2.513358621   | 0.51335535 | 9.78E-07   | 3.03E-05   |
| 26 | ENSG00000080166 | DCT          | 7.217116048 | -2.428185854   | 0.62369639 | 9.89E-05   | 0.00184116 |
| 27 | ENSG00000248964 | LOC101929470 | 9.451779055 | -2.365495917   | 0.50620225 | 2.97E-06   | 8.36E-05   |
| 28 | ENSG00000121316 | PLBD1        | 59.82451017 | -2.349668874   | 0.19581143 | 3.57E-33   | 1.74E-30   |
| 29 | ENSG00000077092 | RARB         | 8.516121821 | -2.339914921   | 0.5406316  | 1.50E-05   | 0.00035858 |
| 30 | ENSG00000234722 | LINC01287    | 64.55862736 | -2.327747844   | 0.19051774 | 2.49E-34   | 1.38E-31   |
| 31 | ENSG00000130477 | UNC13A       | 54.80888495 | -2.27176421    | 0.21938487 | 3.97E-25   | 1.23E-22   |
| 32 | ENSG00000023892 | DEF6         | 31.30976227 | -2.268725182   | 0.39233578 | 7.36E-09   | 3.27E-07   |
| 33 | ENSG00000169164 | XAGE-4       | 6.355493143 | -2.265593412   | 0.5954633  | 0.00014194 | 0.00251965 |
| 34 | ENSG00000225756 | DBH-AS1      | 9.228373164 | -2.219591155   | 0.51228023 | 1.47E-05   | 0.00035265 |
| 35 | ENSG00000093072 | ADA2         | 11.92451253 | -2.216028208   | 0.52608043 | 2.53E-05   | 0.00056344 |
| 36 | ENSG00000104313 | EYA1         | 47.2430923  | -2.213296556   | 0.21926135 | 5.85E-24   | 1.63E-21   |
| 37 | ENSG00000060718 | COL11A1      | 407.0888502 | -2.208704546   | 0.08745804 | 1.01E-140  | 5.44E-137  |
| 38 | ENSG00000152402 | GUCY1A2      | 41.17037279 | -2.18387572    | 0.25324373 | 6.49E-18   | 9.09E-16   |
| 39 | ENSG00000081052 | COL4A4       | 92.83170501 | -2.13575188    | 0.22185214 | 6.15E-22   | 1.38E-19   |
| 40 | ENSG00000123360 | PDE1B        | 15.27726721 | -2.123623731   | 0.41989378 | 4.25E-07   | 1.45E-05   |
| 41 | ENSG00000169064 | ZBBX         | 8.614764149 | -2.123408601   | 0.52858251 | 5.89E-05   | 0.00118669 |
| 42 | ENSG00000072858 | SIDT1        | 31.29130004 | -2.11616292    | 0.27770492 | 2.53E-14   | 2.32E-12   |
| 43 | ENSG00000169174 | PCSK9        | 57.37871818 | -2.099271488   | 0.19802787 | 2.95E-26   | 9.80E-24   |
| 44 | ENSG00000116703 | PDC          | 47.99021499 | -2.085449204   | 0.23682459 | 1.30E-18   | 2.05E-16   |
| 45 | ENSG00000189299 | FOXO2        | 20.12727361 | -2.063530297   | 0.34130891 | 1.49E-09   | 7.30E-08   |
| 46 | ENSG00000249948 | GBA3         | 96.41060469 | -2.054706008   | 0.15065086 | 2.35E-42   | 2.00E-39   |
| 47 | ENSG00000177098 | SCN4B        | 13.4327883  | -2.024052813   | 0.40037968 | 4.30E-07   | 1.46E-05   |
| 48 | ENSG00000133056 | PIK3C2B      | 17.46974091 | -1.96876092    | 0.45484091 | 1.50E-05   | 0.00035855 |
| 49 | ENSG00000183844 | FAM3B        | 37.5948877  | -1.959930232   | 0.2420487  | 5.62E-16   | 6.51E-14   |
| 50 | ENSG00000238269 | PAGE2B       | 28.93086627 | -1.955598798   | 0.29260933 | 2.34E-11   | 1.49E-09   |
| 51 | ENSG00000213315 | RPS18P2      | 7.528293615 | -1.950426003   | 0.60446426 | 0.00125226 | 0.01534897 |
| 52 | ENSG00000187242 | KRT12        | 9.49903222  | -1.948047221   | 0.50490053 | 0.00011419 | 0.00209622 |
| 53 | ENSG00000128564 | VGF          | 27.59953053 | -1.933197265   | 0.28855719 | 2.09E-11   | 1.34E-09   |
| 54 | ENSG00000133454 | MYO18B       | 25.77480135 | -1.92447712    | 0.32430706 | 2.95E-09   | 1.39E-07   |
| 55 | ENSG00000183434 | TFDP3        | 8.881684009 | -1.870835135   | 0.48642148 | 0.00012    | 0.00218308 |
| 56 | ENSG00000101670 | LIPG         | 10.67437507 | -1.864983848   | 0.44194296 | 2.44E-05   | 0.00054927 |
| 57 | ENSG00000156466 | GDF6         | 16.3362028  | -1.864947327   | 0.36130625 | 2.45E-07   | 8.73E-06   |
| 58 | ENSG00000128606 | LRRC17       | 56.63567007 | -1.860431478   | 0.20078225 | 1.93E-20   | 3.90E-18   |
| 59 | ENSG00000164199 | ADGRV1       | 12.73515734 | -1.846881002   | 0.43142424 | 1.86E-05   | 0.00043137 |
| 60 | ENSG00000171951 | SCG2         | 195.5154993 | -1.805886124   | 0.11752386 | 2.76E-53   | 3.71E-50   |
| 61 | ENSG00000119121 | TRPM6        | 10.69068509 | -1.800884144   | 0.47725451 | 0.00016102 | 0.00279671 |
| 62 | ENSG00000143603 | KCNN3        | 19.0432177  | -1.788361935   | 0.32095729 | 2.52E-08   | 1.01E-06   |
| 63 | ENSG00000139304 | PTPRQ        | 14.12914974 | -1.780245983   | 0.39975259 | 8.45E-06   | 0.00021491 |
| 64 | ENSG00000134538 | SLCO1B1      | 10.07389153 | -1.7455175     | 0.59385909 | 0.00328977 | 0.03289361 |
| 65 | ENSG00000221866 | PLXNA4       | 9.789119665 | -1.737238016   | 0.4657352  | 0.00019141 | 0.00322032 |
| 66 | ENSG00000155265 | GOLGA7B      | 7.442739371 | -1.73311621    | 0.52010082 | 0.00086141 | 0.01126047 |
| 67 | ENSG00000233997 | LINC01425    | 135.0974355 | -1.691259194   | 0.12411898 | 2.80E-42   | 2.26E-39   |
| 68 | ENSG00000118432 | CNR1         | 10.91977885 | -1.658270616   | 0.43467797 | 0.00013622 | 0.00243137 |
| 69 | ENSG00000198185 | ZNF334       | 13.93122816 | -1.628236941   | 0.3860092  | 2.46E-05   | 0.00055299 |
| 70 | ENSG00000068985 | PAGE1        | 251.1305199 | -1.625413389   | 0.09637528 | 8.08E-64   | 1.86E-60   |
| 71 | ENSG00000155846 | PPARGC1B     | 21.6754671  | -1.60376206    | 0.47678014 | 0.00076895 | 0.01030257 |
| 72 | ENSG00000164796 | CSMD3        | 78.19729156 | -1.601411467   | 0.16849031 | 2.01E-21   | 4.44E-19   |
| 73 | ENSG00000066032 | CTNNA2       | 15.20803159 | -1.599729415   | 0.37164972 | 1.67E-05   | 0.00039398 |
| 74 | ENSG00000234068 | PAGE2        | 31.60474167 | -1.599222673   | 0.26711923 | 2.14E-09   | 1.02E-07   |
| 75 | ENSG00000233098 | LOC339260    | 7.853236448 | -1.545038723   | 0.54329677 | 0.00445761 | 0.04182057 |

Supplementary Table S3: Contd:

|     |                 |            |             |              |            |            |            |
|-----|-----------------|------------|-------------|--------------|------------|------------|------------|
| 76  | ENSG00000026751 | SLAMF7     | 43.01543841 | -1.542427918 | 0.21004104 | 2.08E-13   | 1.76E-11   |
| 77  | ENSG00000172346 | CSDC2      | 18.95663438 | -1.541886826 | 0.36000167 | 1.84E-05   | 0.00042824 |
| 78  | ENSG00000255099 | LOC644335  | 9.203285859 | -1.539530811 | 0.50477929 | 0.00228911 | 0.02443434 |
| 79  | ENSG00000079308 | TNS1       | 380.0211752 | -1.520379115 | 0.0828204  | 2.87E-75   | 7.72E-72   |
| 80  | ENSG00000171631 | P2RY6      | 11.38113951 | -1.516436569 | 0.48309408 | 0.0016952  | 0.01943335 |
| 81  | ENSG00000204019 | CTB3       | 94.94254632 | -1.507894876 | 0.24982861 | 1.58E-09   | 7.73E-08   |
| 82  | ENSG00000189369 | GSP2       | 42.09479629 | -1.495589889 | 0.22702936 | 4.47E-11   | 2.76E-09   |
| 83  | ENSG00000204832 | TBS1A6-AS1 | 26.96191111 | -1.493907488 | 0.39611075 | 0.00016231 | 0.00280998 |
| 84  | ENSG00000140465 | CYP1A1     | 88.50661331 | -1.486944898 | 0.16501099 | 2.04E-19   | 3.69E-17   |
| 85  | ENSG00000238265 | LINC00317  | 69.42614877 | -1.486534967 | 0.17005014 | 2.30E-18   | 3.52E-16   |
| 86  | ENSG00000152990 | ADGRA3     | 309.7435368 | -1.467863454 | 0.09121311 | 2.87E-58   | 5.79E-55   |
| 87  | ENSG00000127533 | F2RL3      | 16.10551186 | -1.453327934 | 0.38601553 | 0.00016659 | 0.00287474 |
| 88  | ENSG00000132122 | SPATA6     | 13.06893549 | -1.443544511 | 0.38269697 | 0.00016193 | 0.00280937 |
| 89  | ENSG00000100234 | TIMP3      | 12.92733224 | -1.44033295  | 0.39664221 | 0.00028198 | 0.0044646  |
| 90  | ENSG00000133048 | CHI3L1     | 274.1454059 | -1.43989896  | 0.10662413 | 1.47E-41   | 9.89E-39   |
| 91  | ENSG00000187398 | LUZP2      | 113.6308234 | -1.431143092 | 0.14099803 | 3.31E-24   | 9.36E-22   |
| 92  | ENSG00000163947 | ARHGEF3    | 9.174006329 | -1.421108096 | 0.46279526 | 0.00213553 | 0.02332015 |
| 93  | ENSG00000251191 | LINC00589  | 11.69854983 | -1.418540414 | 0.47014383 | 0.00255081 | 0.0266974  |
| 94  | ENSG00000109771 | LRP2BP     | 20.3566237  | -1.40631345  | 0.34112318 | 3.75E-05   | 0.0007966  |
| 95  | ENSG00000198033 | TUBA3C     | 10.24937129 | -1.389822738 | 0.44055695 | 0.00160666 | 0.01858711 |
| 96  | ENSG00000253301 | LINC01606  | 15.9560152  | -1.3837344   | 0.36420338 | 0.00014508 | 0.00256965 |
| 97  | ENSG00000182492 | BGN        | 53.76409128 | -1.332510935 | 0.23633904 | 1.72E-08   | 7.07E-07   |
| 98  | ENSG00000117215 | PLA2G2D    | 15.23323377 | -1.329408702 | 0.37911248 | 0.00045381 | 0.00670445 |
| 99  | ENSG00000197046 | SIGLEC15   | 117.6260527 | -1.326362023 | 0.1550245  | 1.17E-17   | 1.57E-15   |
| 100 | ENSG00000166689 | PLEKHA7    | 10.63388984 | -1.326186639 | 0.44268967 | 0.00273773 | 0.02814201 |
| 101 | ENSG00000213401 | MAGEA12    | 25.54303113 | -1.325375059 | 0.2759163  | 1.56E-06   | 4.70E-05   |
| 102 | ENSG00000165509 | MAGEC3     | 37.20520932 | -1.310977725 | 0.22748228 | 8.26E-09   | 3.64E-07   |
| 103 | ENSG00000224982 | TMEM233    | 34.30160792 | -1.293741527 | 0.25346195 | 3.32E-07   | 1.16E-05   |
| 104 | ENSG00000066056 | TIE1       | 91.50901547 | -1.27570934  | 0.14759593 | 5.46E-18   | 7.79E-16   |
| 105 | ENSG00000135439 | AGAP2      | 206.3863173 | -1.257733413 | 0.12535286 | 1.09E-23   | 2.92E-21   |
| 106 | ENSG00000233521 | LINC01638  | 11.75048744 | -1.245525307 | 0.41540101 | 0.00271429 | 0.02798246 |
| 107 | ENSG00000143772 | ITPKB      | 64.79911489 | -1.240112678 | 0.18500055 | 2.04E-11   | 1.31E-09   |
| 108 | ENSG00000103942 | HOMER2     | 14.62789849 | -1.221624208 | 0.39400043 | 0.00193151 | 0.02155965 |
| 109 | ENSG00000147041 | SYTL5      | 14.36698093 | -1.208653138 | 0.37982157 | 0.00146181 | 0.01733733 |
| 110 | ENSG00000003137 | CYP26B1    | 17.95076402 | -1.203741322 | 0.35540874 | 0.00070682 | 0.00962049 |
| 111 | ENSG00000213931 | HB1        | 125.1394794 | -1.198907113 | 0.13367045 | 2.99E-19   | 5.35E-17   |
| 112 | ENSG00000054690 | PLEKHH1    | 19.2518253  | -1.187364506 | 0.32651052 | 0.00027634 | 0.00439252 |
| 113 | ENSG00000155622 | XAGE2      | 11.19209053 | -1.172340537 | 0.40658315 | 0.00393412 | 0.03794722 |
| 114 | ENSG00000167850 | CD300C     | 14.43089041 | -1.158927321 | 0.37421078 | 0.00195496 | 0.02171609 |
| 115 | ENSG00000147443 | DOK2       | 20.16967727 | -1.155462081 | 0.33329842 | 0.00052679 | 0.00757783 |
| 116 | ENSG00000188511 | MIR3667HG  | 14.95782277 | -1.144976711 | 0.39386911 | 0.00364916 | 0.03579859 |
| 117 | ENSG00000145934 | TENM2      | 183.8345987 | -1.124320143 | 0.11550921 | 2.17E-22   | 5.14E-20   |
| 118 | ENSG00000144712 | CAND2      | 98.27440087 | -1.119913408 | 0.17695984 | 2.47E-10   | 1.40E-08   |
| 119 | ENSG00000114487 | MORC1      | 42.96478866 | -1.118634615 | 0.23072809 | 1.25E-06   | 3.80E-05   |
| 120 | ENSG00000151117 | TMEM86A    | 46.2851824  | -1.118440618 | 0.20178504 | 2.98E-08   | 1.19E-06   |
| 121 | ENSG00000151224 | MAT1A      | 30.68211562 | -1.109133974 | 0.26882601 | 3.69E-05   | 0.00078648 |
| 122 | ENSG00000160588 | MPZL5      | 14.00337555 | -1.104807357 | 0.366511   | 0.00257496 | 0.02686291 |
| 123 | ENSG00000169551 | CT55       | 100.627085  | -1.092924819 | 0.19600903 | 2.46E-08   | 9.97E-07   |
| 124 | ENSG00000221852 | KRTAP1-5   | 41.77207734 | -1.07154598  | 0.25844261 | 3.38E-05   | 0.00072658 |
| 125 | ENSG00000107165 | TYRP1      | 124.1724628 | -1.06456479  | 0.14469828 | 1.88E-13   | 1.59E-11   |
| 126 | ENSG00000114013 | CD86       | 15.4074978  | -1.032983813 | 0.37151488 | 0.00542813 | 0.04876841 |
| 127 | ENSG00000171234 | UGT2B7     | 483.3734755 | -1.032630111 | 0.09474414 | 1.16E-27   | 4.46E-25   |
| 128 | ENSG00000077063 | CTTNBP2    | 83.42555747 | -1.011212383 | 0.17426062 | 6.52E-09   | 2.92E-07   |
| 129 | ENSG00000113645 | WWC1       | 57.62727544 | -1.009445773 | 0.22034673 | 4.62E-06   | 0.00012318 |
| 130 | ENSG00000154451 | GBP5       | 1245.782732 | 0.998716977  | 0.12430968 | 9.43E-16   | 1.03E-13   |
| 131 | ENSG00000205413 | SAMD9      | 9235.254268 | 1.000286349  | 0.17625075 | 1.38E-08   | 5.85E-07   |
| 132 | ENSG00000178685 | PARP10     | 1581.748995 | 1.0027906    | 0.14137911 | 1.31E-12   | 9.75E-11   |
| 133 | ENSG00000130775 | THEMIS2    | 379.0646761 | 1.006373825  | 0.12202503 | 1.62E-16   | 1.98E-14   |
| 134 | ENSG00000165495 | PKNOX2     | 37.45092    | 1.008531845  | 0.23844764 | 2.34E-05   | 0.00053077 |
| 135 | ENSG00000162654 | GBP4       | 578.1635417 | 1.016537799  | 0.20316575 | 5.63E-07   | 1.86E-05   |
| 136 | ENSG00000163568 | AIM2       | 44.409172   | 1.021743866  | 0.22305631 | 4.64E-06   | 0.00012318 |
| 137 | ENSG00000130589 | HELZ2      | 5708.983003 | 1.025870851  | 0.14674091 | 2.73E-12   | 1.96E-10   |
| 138 | ENSG00000115271 | GCA        | 98.5505951  | 1.026101022  | 0.16382396 | 3.77E-10   | 2.04E-08   |
| 139 | ENSG00000188313 | PLSCR1     | 5463.677615 | 1.029134479  | 0.12396174 | 1.02E-16   | 1.28E-14   |
| 140 | ENSG00000151834 | GABRA2     | 41.00147902 | 1.041010241  | 0.2366361  | 1.09E-05   | 0.00026942 |
| 141 | ENSG00000168843 | FSTL5      | 46.32651825 | 1.056118033  | 0.25004127 | 2.40E-05   | 0.00054157 |
| 142 | ENSG00000109756 | RAPGEF2    | 4378.935804 | 1.056468325  | 0.04396664 | 1.39E-127  | 5.60E-124  |
| 143 | ENSG00000151952 | TMEM132D   | 46.0771148  | 1.075677501  | 0.25022956 | 1.72E-05   | 0.00040296 |
| 144 | ENSG00000138642 | HERC6      | 3415.590294 | 1.076847044  | 0.13922849 | 1.04E-14   | 9.74E-13   |
| 145 | ENSG00000102524 | TNFSF13B   | 252.6580078 | 1.082078789  | 0.13374772 | 5.94E-16   | 6.80E-14   |
| 146 | ENSG00000111199 | TRPV4      | 34.19698977 | 1.100647222  | 0.39749504 | 0.00562358 | 0.04996742 |
| 147 | ENSG00000185352 | HS6ST3     | 33.82144868 | 1.103800728  | 0.28746028 | 0.00012312 | 0.00222714 |
| 148 | ENSG00000108381 | ASPA       | 28.1849589  | 1.107026613  | 0.27489162 | 5.65E-05   | 0.00114911 |
| 149 | ENSG00000115267 | IFIH1      | 1373.161833 | 1.128167221  | 0.16983078 | 3.08E-11   | 1.92E-09   |
| 150 | ENSG00000168062 | BATF2      | 237.2286314 | 1.128243303  | 0.14533367 | 8.29E-15   | 7.90E-13   |

Supplementary Table S3: Contd:

|     |                 |              |             |             |            |            |            |
|-----|-----------------|--------------|-------------|-------------|------------|------------|------------|
| 151 | ENSG00000107201 | DDX58        | 4227.220347 | 1.14288787  | 0.18200661 | 3.40E-10   | 1.86E-08   |
| 152 | ENSG00000172183 | ISG20        | 95.38628637 | 1.15762553  | 0.22700721 | 3.41E-07   | 1.19E-05   |
| 153 | ENSG00000137965 | IFI44        | 2622.842329 | 1.171583766 | 0.12366219 | 2.69E-21   | 5.86E-19   |
| 154 | ENSG00000084453 | SLCO1A2      | 32.94004675 | 1.182226991 | 0.28479548 | 3.31E-05   | 0.00071285 |
| 155 | ENSG00000153993 | SEMA3D       | 19.92442062 | 1.195720886 | 0.36724325 | 0.00113019 | 0.01410784 |
| 156 | ENSG00000133106 | EPSTI1       | 1157.459181 | 1.213695512 | 0.15097132 | 9.04E-16   | 9.98E-14   |
| 157 | ENSG00000196220 | SRGAP3       | 550.2922203 | 1.223985336 | 0.09012125 | 5.15E-42   | 3.78E-39   |
| 158 | ENSG00000126561 | STAT5A       | 17.2628258  | 1.254560314 | 0.37544374 | 0.00083315 | 0.01100714 |
| 159 | ENSG00000133561 | GIMAP6       | 17.72589053 | 1.25921771  | 0.34696936 | 0.00028431 | 0.0044971  |
| 160 | ENSG00000078487 | ZCWPW1       | 171.7036457 | 1.261466608 | 0.12137935 | 2.67E-25   | 8.45E-23   |
| 161 | ENSG00000174448 | STARD6       | 17.85145483 | 1.279636441 | 0.39303694 | 0.00113087 | 0.01410784 |
| 162 | ENSG00000183486 | MX2          | 2830.951602 | 1.295094577 | 0.22880832 | 1.51E-08   | 6.30E-07   |
| 163 | ENSG00000229292 | RFLPL4AL1    | 10.23949886 | 1.313964628 | 0.46754397 | 0.00494869 | 0.04539722 |
| 164 | ENSG00000121858 | TNFSF10      | 254.3969101 | 1.31989155  | 0.35285802 | 0.0001836  | 0.00311831 |
| 165 | ENSG00000138646 | HERC5        | 154.764679  | 1.324348817 | 0.18684687 | 1.36E-12   | 1.01E-10   |
| 166 | ENSG00000120262 | CCDC170      | 41.646166   | 1.334629297 | 0.27156856 | 8.90E-07   | 2.81E-05   |
| 167 | ENSG00000187608 | ISG15        | 3329.680937 | 1.34873945  | 0.14664926 | 3.68E-20   | 7.15E-18   |
| 168 | ENSG00000146374 | RSPO3        | 56.84118923 | 1.350708381 | 0.23654499 | 1.13E-08   | 4.84E-07   |
| 169 | ENSG00000124875 | CXCL6        | 26.2120512  | 1.374966653 | 0.2972654  | 3.74E-06   | 0.00010249 |
| 170 | ENSG00000115738 | ID2          | 114.5944343 | 1.380990839 | 0.15735271 | 1.69E-18   | 2.64E-16   |
| 171 | ENSG00000111335 | OAS2         | 5246.250826 | 1.416308946 | 0.23380966 | 1.38E-09   | 6.90E-08   |
| 172 | ENSG00000005108 | THSD7A       | 126.1391828 | 1.418562592 | 0.16197276 | 1.99E-18   | 3.08E-16   |
| 173 | ENSG00000136514 | RTP4         | 151.7740378 | 1.430964502 | 0.25378953 | 1.72E-08   | 7.07E-07   |
| 174 | ENSG00000095637 | SORBS1       | 22.33209027 | 1.447812254 | 0.36473629 | 7.20E-05   | 0.0014124  |
| 175 | ENSG00000119917 | IFIT3        | 9346.640196 | 1.449047079 | 0.18515793 | 5.04E-15   | 4.92E-13   |
| 176 | ENSG00000184979 | USP18        | 322.0684426 | 1.467948376 | 0.20830342 | 1.83E-12   | 1.34E-10   |
| 177 | ENSG00000174672 | BRSK2        | 18.58883459 | 1.500165104 | 0.43605933 | 0.00058112 | 0.00819379 |
| 178 | ENSG00000126709 | IFI6         | 5742.083446 | 1.505819383 | 0.18215434 | 1.38E-16   | 1.69E-14   |
| 179 | ENSG00000174469 | CNTNAP2      | 91.76710651 | 1.521076879 | 0.17164444 | 7.87E-19   | 1.30E-16   |
| 180 | ENSG00000185507 | IRF7         | 401.0530617 | 1.52462822  | 0.12558695 | 6.48E-34   | 3.26E-31   |
| 181 | ENSG00000132530 | XAF1         | 2040.054972 | 1.553325181 | 0.19532048 | 1.82E-15   | 1.95E-13   |
| 182 | ENSG00000188729 | OSTN         | 29.63823625 | 1.571845852 | 0.32107575 | 9.80E-07   | 3.03E-05   |
| 183 | ENSG00000119922 | IFIT2        | 4971.873718 | 1.58279498  | 0.30960394 | 3.18E-07   | 1.11E-05   |
| 184 | ENSG00000130303 | BST2         | 515.5495804 | 1.606232166 | 0.26706427 | 1.81E-09   | 8.71E-08   |
| 185 | ENSG00000135114 | OASL         | 678.5997594 | 1.618086622 | 0.29500802 | 4.14E-08   | 1.63E-06   |
| 186 | ENSG00000185745 | IFIT1        | 9499.598383 | 1.625236973 | 0.27553788 | 3.67E-09   | 1.70E-07   |
| 187 | ENSG00000144406 | UNC80        | 33.35643479 | 1.645853163 | 0.28211885 | 5.41E-09   | 2.47E-07   |
| 188 | ENSG00000157601 | MX1          | 788.0643921 | 1.681938524 | 0.21314547 | 3.00E-15   | 3.02E-13   |
| 189 | ENSG00000239713 | APOBEC3G     | 8.18904619  | 1.691605569 | 0.55345102 | 0.00223961 | 0.02404933 |
| 190 | ENSG00000137959 | IFI44L       | 1895.516831 | 1.708381178 | 0.25640907 | 2.69E-11   | 1.69E-09   |
| 191 | ENSG00000166960 | CCDC178      | 7.26978729  | 1.752817694 | 0.63238705 | 0.00557561 | 0.04973312 |
| 192 | ENSG00000111331 | OAS3         | 1400.741081 | 1.764905695 | 0.19334849 | 6.97E-20   | 1.31E-17   |
| 193 | ENSG00000226317 | LINC00351    | 9.266894321 | 1.806647874 | 0.56683221 | 0.00143622 | 0.0171094  |
| 194 | ENSG00000038945 | MSR1         | 32.73363174 | 1.90576932  | 0.2834418  | 1.77E-11   | 1.15E-09   |
| 195 | ENSG00000144278 | GALNT13      | 6.60108041  | 1.919131542 | 0.66703098 | 0.00401317 | 0.03843387 |
| 196 | ENSG00000089127 | OAS1         | 1610.52137  | 1.921030489 | 0.42261977 | 5.48E-06   | 0.00014455 |
| 197 | ENSG00000165949 | IFI27        | 258.5776744 | 1.946606353 | 0.30782671 | 2.55E-10   | 1.43E-08   |
| 198 | ENSG00000010030 | ETV7         | 8.148691404 | 1.961426063 | 0.58560482 | 0.00080986 | 0.01076121 |
| 199 | ENSG00000133083 | DCLK1        | 22.7244345  | 2.032941519 | 0.34453054 | 3.62E-09   | 1.68E-07   |
| 200 | ENSG00000185885 | IFITM1       | 280.1140973 | 2.041462591 | 0.28144958 | 4.06E-13   | 3.23E-11   |
| 201 | ENSG00000241106 | HLA-DOB      | 5.471139168 | 2.128224123 | 0.76672129 | 0.00550751 | 0.0492893  |
| 202 | ENSG00000090402 | SI           | 42.51811075 | 2.204651064 | 0.25717636 | 1.01E-17   | 1.37E-15   |
| 203 | ENSG00000133710 | SPINK5       | 8.452237123 | 2.234851652 | 0.58886857 | 0.00014755 | 0.00259962 |
| 204 | ENSG00000276231 | PIK3R6       | 134.9643611 | 2.342026509 | 0.16248443 | 4.23E-47   | 4.55E-44   |
| 205 | ENSG00000158560 | DYNC1I1      | 6.377273324 | 2.424797676 | 0.72690522 | 0.0008506  | 0.01119177 |
| 206 | ENSG00000182162 | P2RY8        | 18.87220663 | 2.524684149 | 0.41364546 | 1.04E-09   | 5.33E-08   |
| 207 | ENSG00000143110 | C1orf162     | 11.78916585 | 2.544995348 | 0.52938005 | 1.53E-06   | 4.62E-05   |
| 208 | ENSG00000186439 | TRDN         | 25.75149955 | 2.609133191 | 0.37183102 | 2.27E-12   | 1.65E-10   |
| 209 | ENSG00000100346 | CACNA1I      | 9.6898529   | 2.653576793 | 0.70199317 | 0.00015679 | 0.00273739 |
| 210 | ENSG00000256321 | LOC101928441 | 5.44891664  | 2.944267937 | 0.83642378 | 0.00043144 | 0.00643285 |
| 211 | ENSG00000115252 | PDE1A        | 13.82895103 | 3.249650639 | 0.53806636 | 1.55E-09   | 7.57E-08   |
| 212 | ENSG00000112562 | SMOC2        | 7.057546302 | 3.816276727 | 0.8619899  | 9.54E-06   | 0.00023874 |
| 213 | ENSG00000153064 | BANK1        | 20.21074936 | 3.843776167 | 0.51467993 | 8.12E-14   | 7.08E-12   |
| 214 | ENSG00000152503 | TRIM36       | 868.8236345 | 4.302452142 | 0.09804759 | 0          | 0          |
| 215 | ENSG00000139351 | SYCP3        | 20.93493137 | 4.764018503 | 0.66082585 | 5.63E-13   | 4.38E-11   |
| 216 | ENSG00000111729 | CLEC4A       | 445.3379364 | 6.477572987 | 0.23627808 | 1.82E-165  | 1.46E-161  |

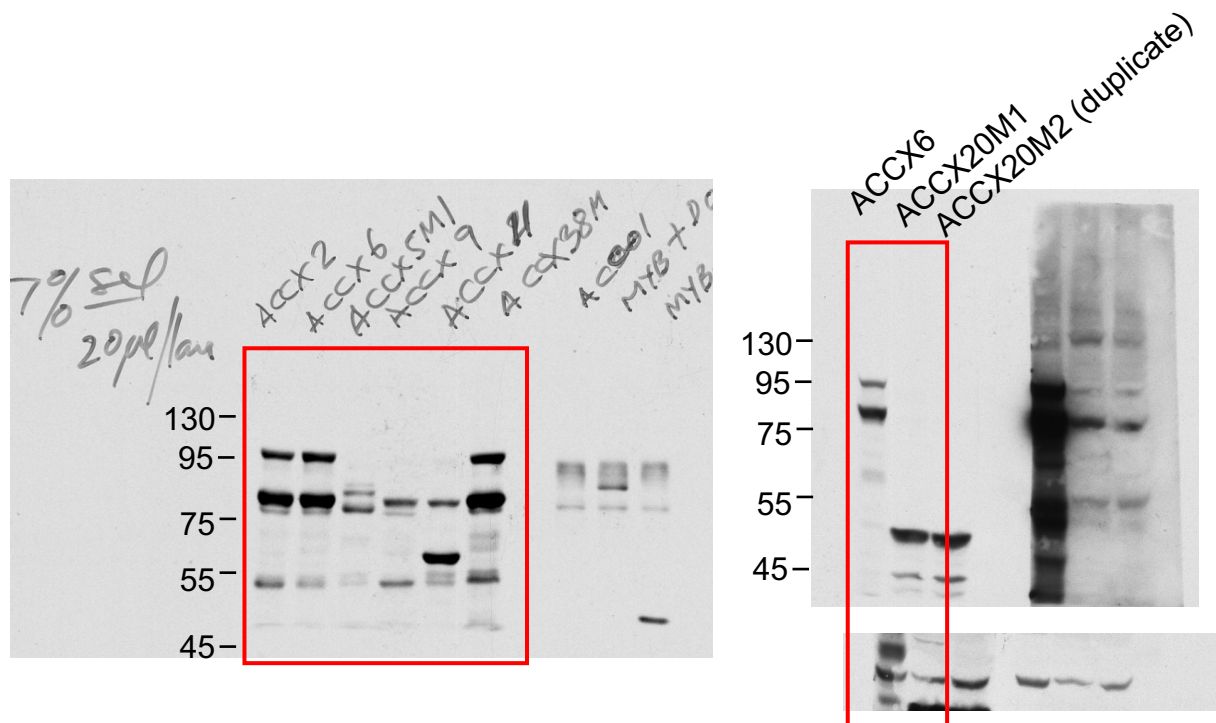

**Fig. 2B**

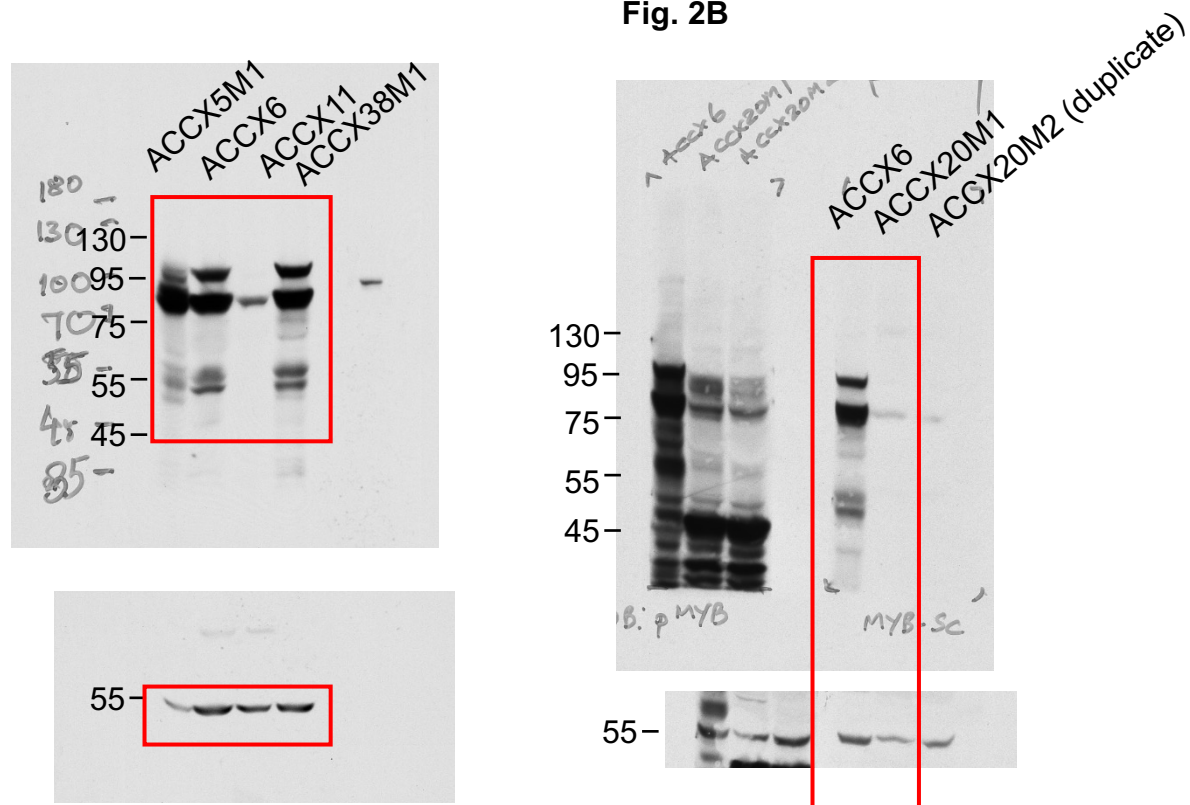

**Fig 2C**

Supplemental Fig. S1: Original Western blots for data shown in Fig 2. Red box indicates the cropped region.

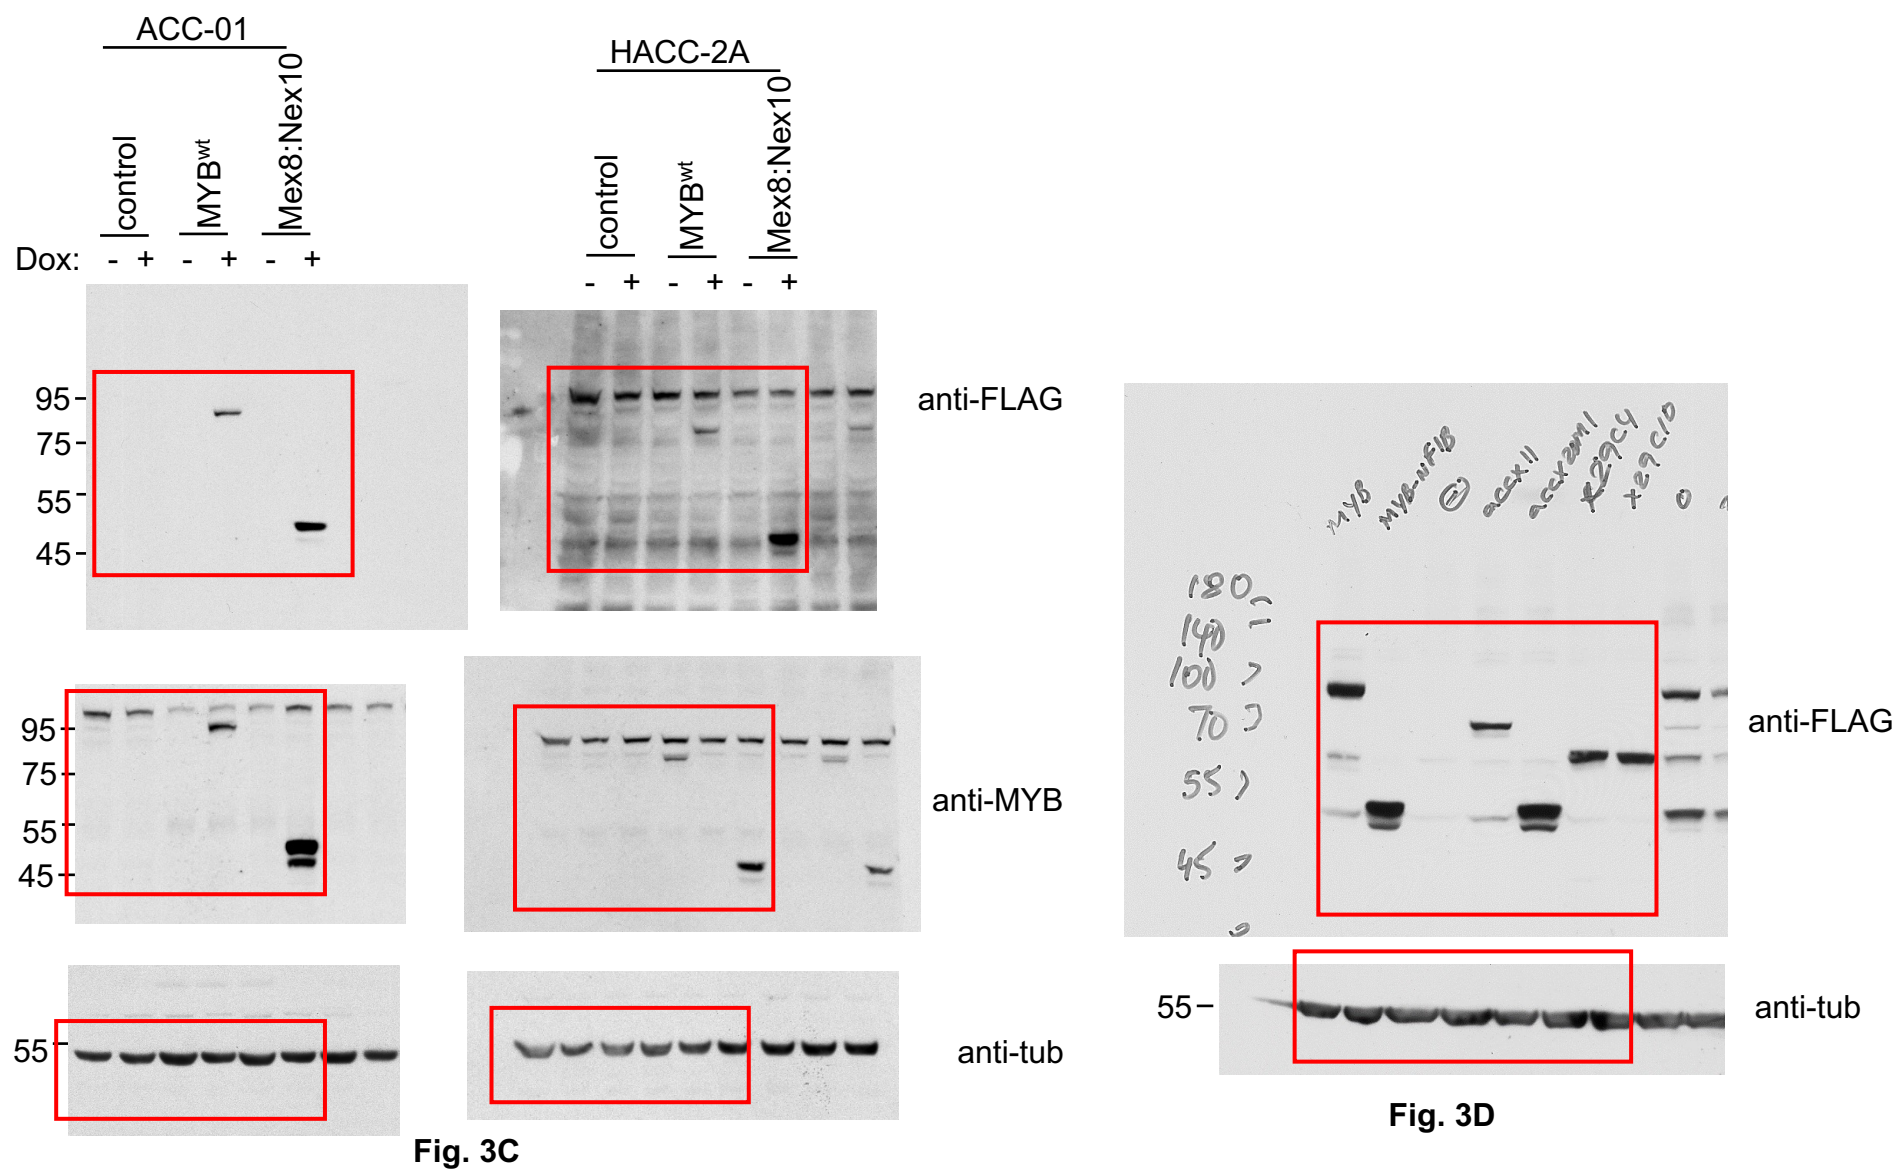

Supplemental Fig. S2: Original Western blots for data shown in Fig 3C and D. Red box indicates the cropped region.

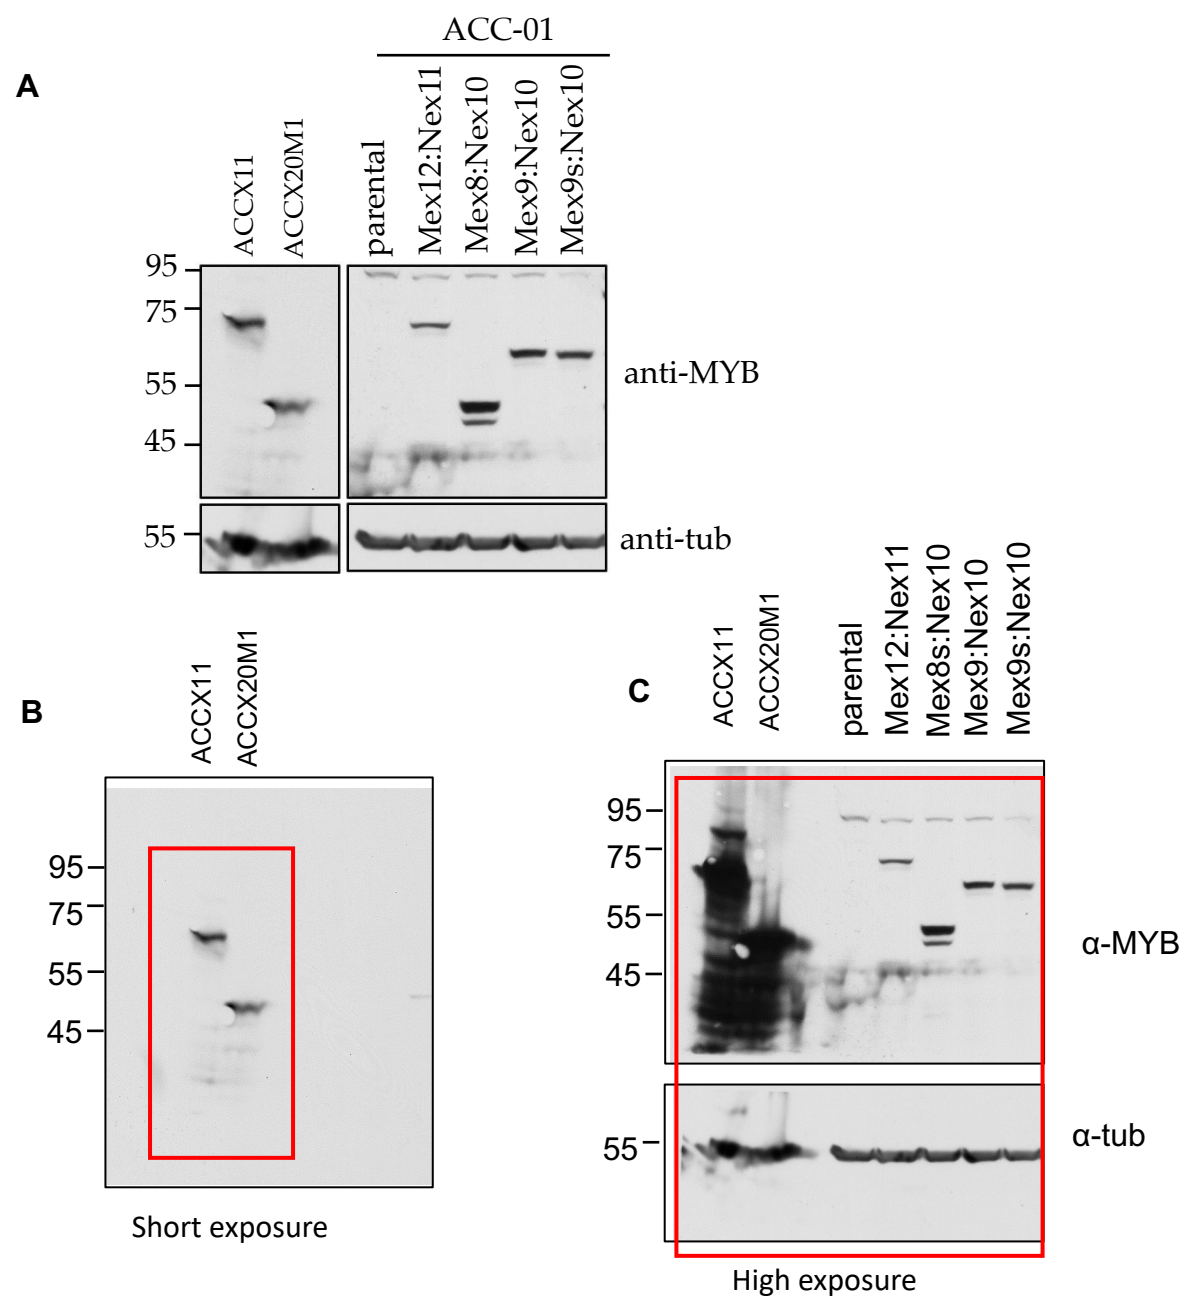

Supplemental Fig. S3: MYB-NFIB fusion expression in ACCX11 and ACCX20M1. (A), Cell lysates from the indicated patient-derived xenografts and ACC-01 cells expressing the various MYB-NFIB constructs were analyzed by immunoblotting using N-terminal epitope MYB antibody. Note that Mex12:Nex11 and Mex8:Nex10 were derived from ACCX11 and ACCX20M1, respectively. Although, there are no specific antibody that selectively detect MYB-NFIB fusion, this data supports the detectable MYB-NFIB fusion protein expression in ACCX11 and ACCX20M1. (B and C), Original Western blots of "A" with short and high exposed x-ray film.

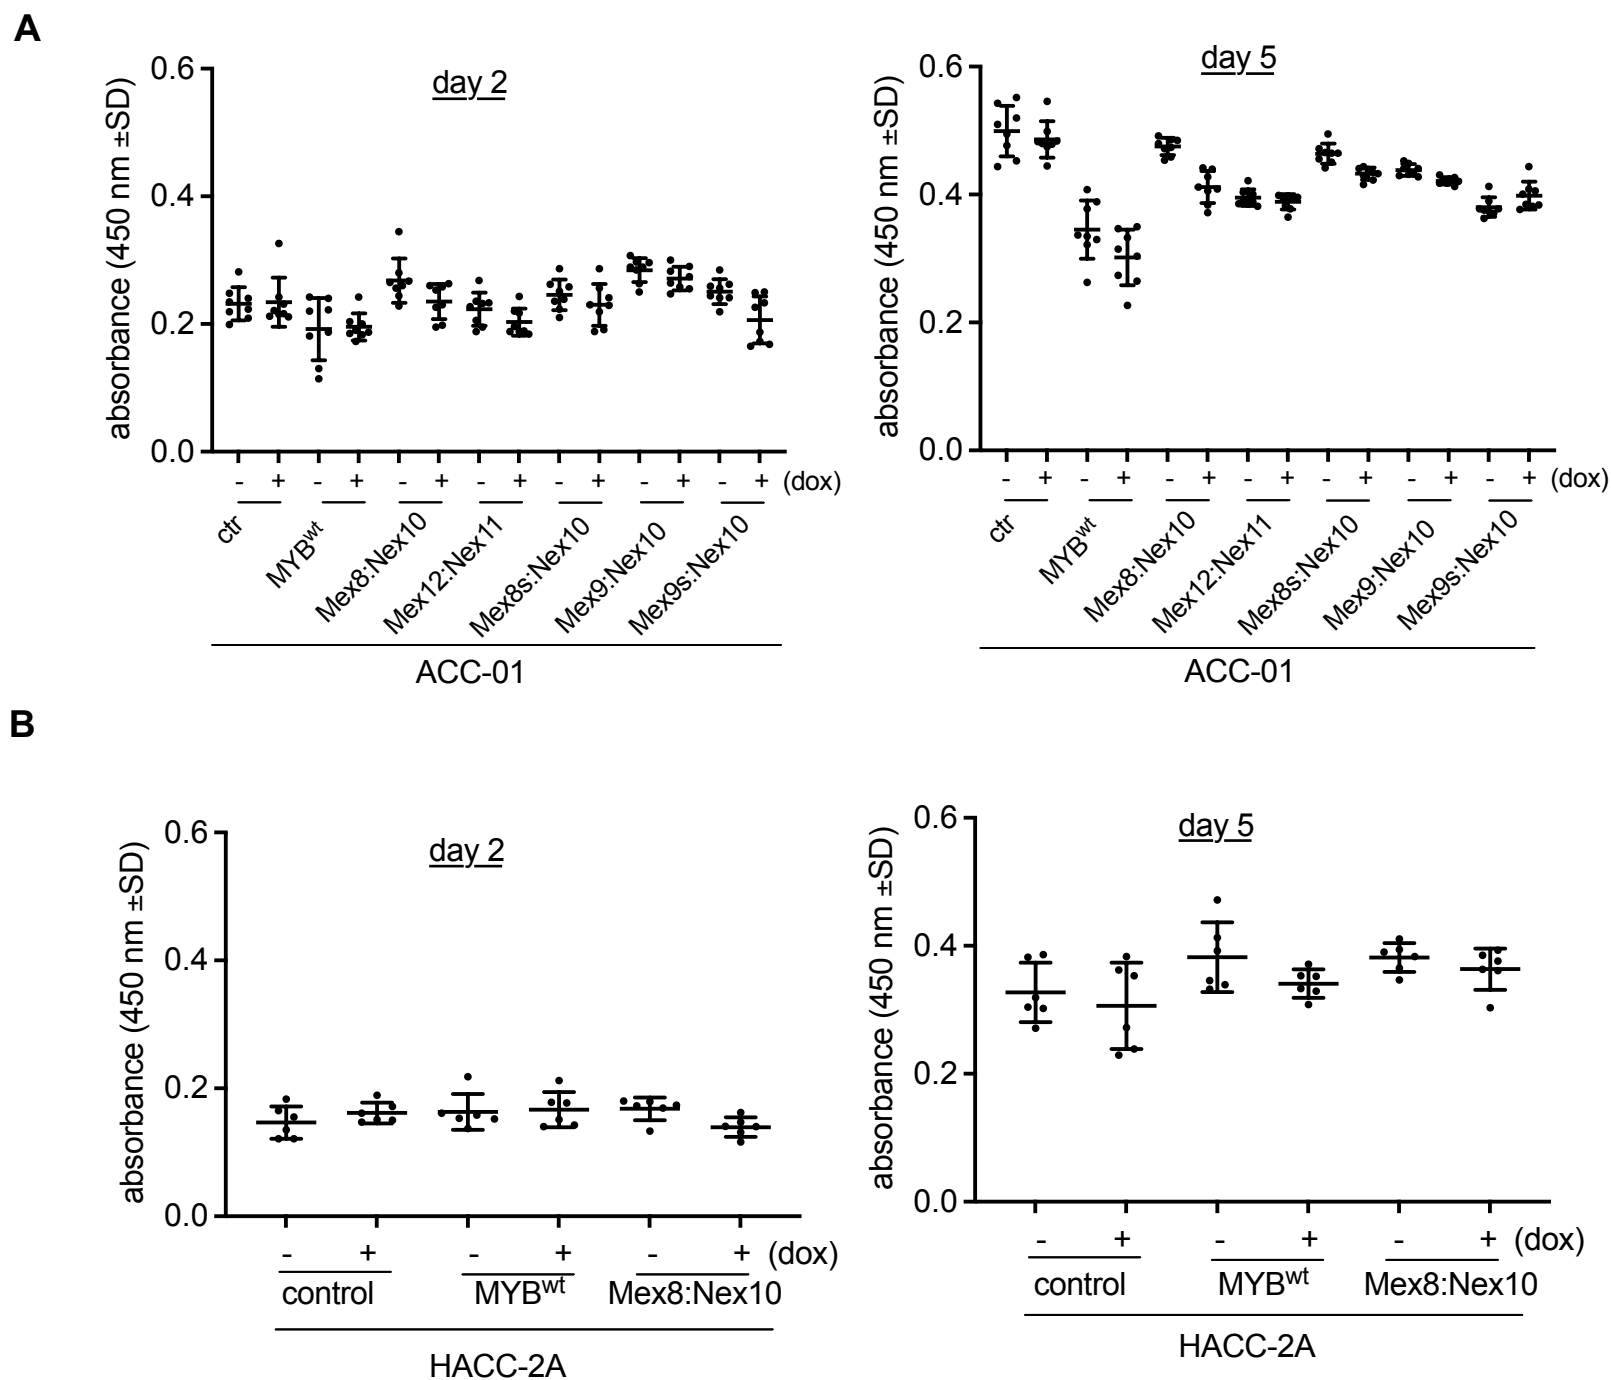

Supplemental Fig. S4: In vitro growth activities of MYB-MNFIB fusion in ACC cells. Indicated ACC cells were incubated either in the absence or presence of dox for up to 5 days. Change in growth activities was then measured by MTT assay. Note that expression of MYB or MYB-NFIB fusion does not impact cell growth activities in either ACC-01 (A) or HACC-2A cells.

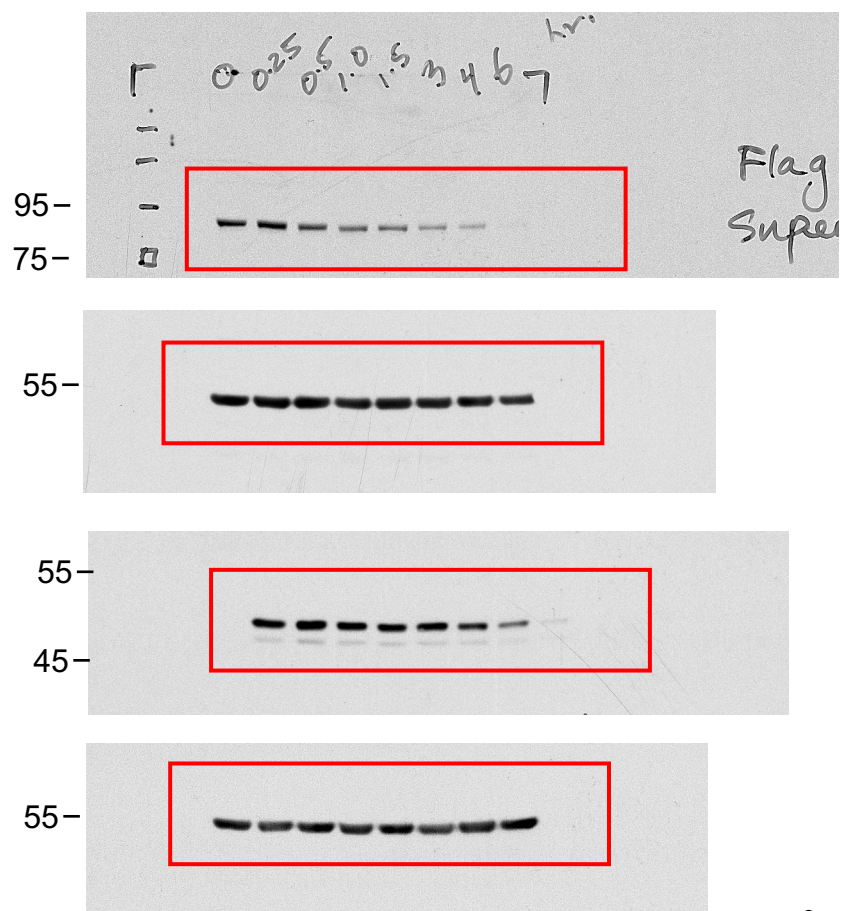

**Fig. 4A**

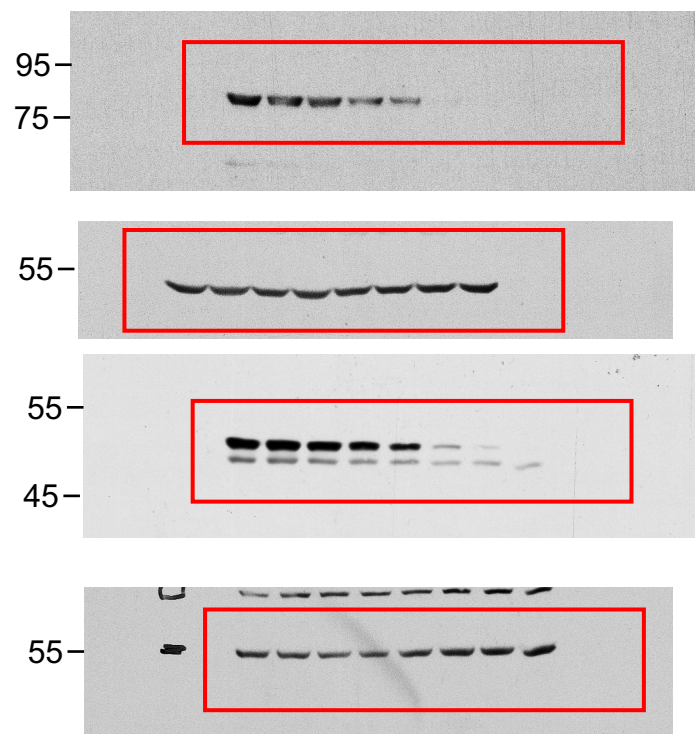

**Fig 4C**

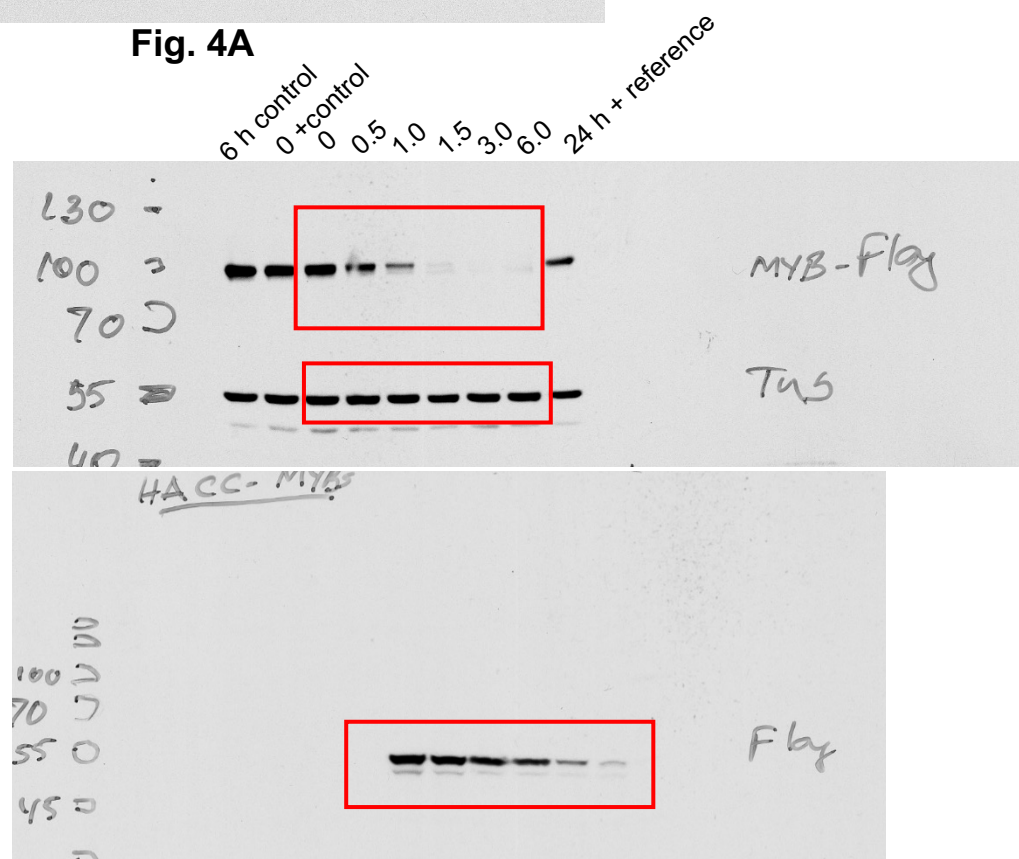

**Fig. 4E**

Supplemental Fig. S5: Original Western blots for data shown in Fig 4A, C and E. Red box indicates the cropped region.

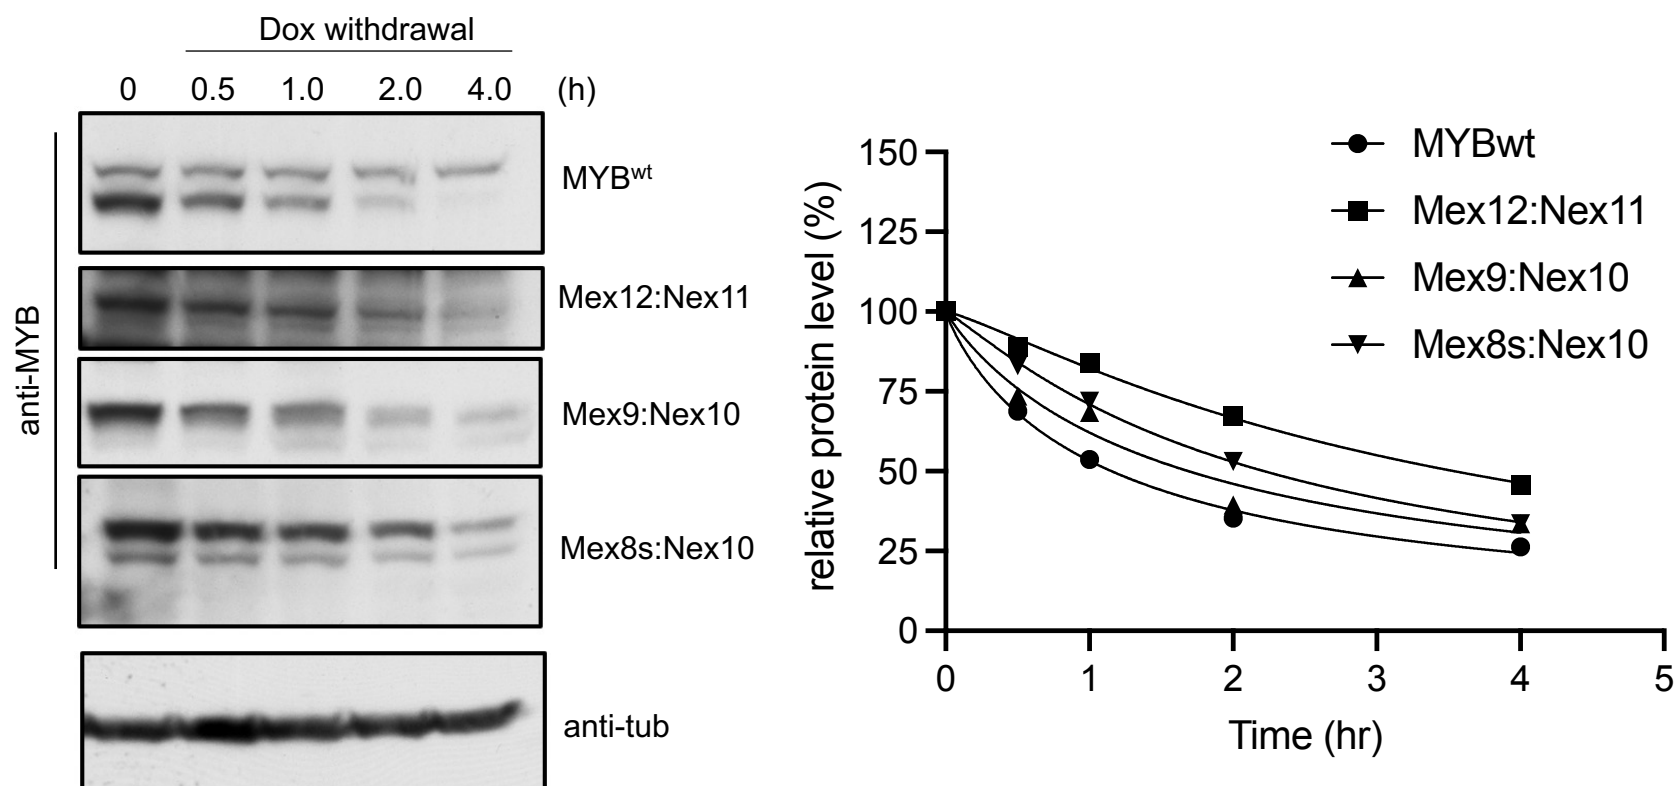

Supplemental Fig. S6. Differential protein stability of MYB<sup>wt</sup> and MYB-NFIB fusion. (A), Stable ACC-01 cells harboring FLAG-tagged MYB<sup>wt</sup> or variants of MYB-NFIB fusion were dox-induced for 24 h, then re-cultured in media without dox for the indicated time period. Cells lysates was prepared and analyzed by Western blotting using MYB antibody followed by densitometry to determine protein degradation pattern of MYB<sup>wt</sup> and MYB-NFIB fusions.

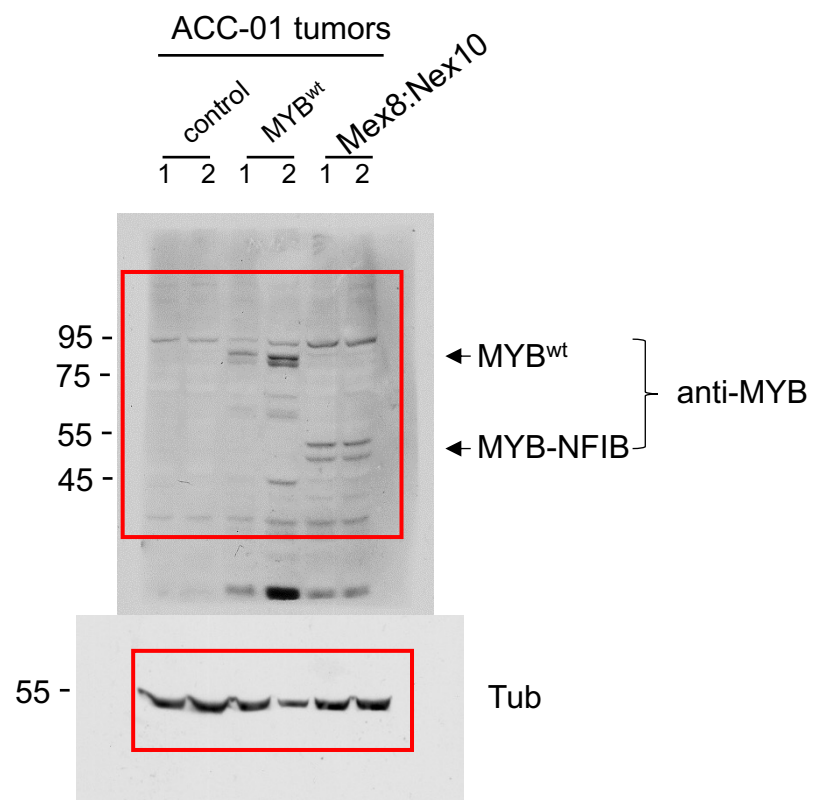

**Fig. 6B**

Supplemental Fig. S7: Original Western blots for data shown in Fig 6B. Red box indicates the cropped region.
